# Supplementary material
Source: Research Square preprint supplement (doi:10.21203/rs.3.rs-8861590/v1)
Supplement: Supplementary file 1 [file 12c7b0d0b430e84ae558f74a.docx]

**Motivation and Educational Culture: Iranian EFL Learners’ Views on Teacher Strategies**

# **Abstract**

Understanding how to effectively strengthen learners’ motivation requires attention to the cultural and social conditions that shape how motivational strategies function. In educational settings such as Iran, where teacher authority, collectivist values, and high-stakes assessment strongly influence classroom norms, motivational practices operate as both pedagogical tools and culturally embedded behaviours. This study examines how Iranian upper-intermediate EFL learners evaluate the importance and classroom frequency of a range of motivational strategies used by teachers. A modified Likert-scale questionnaire was administered to 182 students, who rated both the priority and regularity of these strategies. Descriptive and correlational analyses indicated that learners generally perceived a broad alignment between what they considered important and what teachers reportedly used, though several noteworthy gaps emerged. The results show that students gave the highest priority to strategies involving teacher conduct, acknowledgement of effort, and the creation of a supportive classroom environment: patterns reflecting deeper cultural expectations regarding authority, respect, and collective harmony. By situating these patterns within ongoing discussions about educational and social transformation, the study suggests that motivational strategies are not neutral techniques, but part of wider negotiations involving teacher–student relations, learner autonomy, and institutional change. A modest discrepancy also emerged between the strategies learners valued most and those they perceived teachers using most consistently, suggesting that classroom practice does not always reflect learners’ motivational priorities. Implications are outlined for teacher education, language policy, instructional quality, and the cultural dynamics that shape motivation in Iranian EFL contexts.

***Keywords:*** Motivational Strategies; Iranian EFL; Educational Culture; Teacher Authority; Social Change

# 1. **Introduction**

According to Dörnyei (1998, 2001), motivation has long been recognized as a foundational element in language learning and teaching. As Cheng and Dörnyei (2007) maintain, motivation drives learners’ immediate engagement and sustains long-term commitment. Recent studies in different contexts (e.g., Abdal et al., 2025; Barjesteh et al., 2025; Nazarova & Pulatova, 2025) similarly emphasize the continued relevance of motivational factors in contemporary classrooms. Since the pioneering work of Gardner and Lambert (1959), Oxford and Shearin (1994), and Spolsky (2000), motivation has remained a central concept in second-language research, leading scholars to explore its theoretical dimensions in diverse ways (Nazarova & Pulatova, 2025). More recent developments have shifted attention toward the practical side of motivation, emphasizing how specific classroom strategies can foster or hinder learner engagement (Guilloteaux & Dörnyei, 2008; Hiromori, 2009). However, these strategies cannot be separated from the cultural and institutional contexts in which they are used (Gafarova, 2025; Kormos et al., 2011).

In Iran, motivational practices are deeply intertwined with cultural expectations surrounding teacher authority, classroom hierarchy, and collectivist approaches to learning. Learners frequently view teachers not only as sources of knowledge, but also as figures who provide reassurance, discipline, and acknowledgment (Isaee & Barjesteh, 2025; Karimi & Hosseinizade, 2019; Safdari, 2018). At the same time, Iran’s exam-oriented system and recent pressures related to globalization have begun reshaping what students expect from instruction, creating a dynamic tension between traditional norms and emerging practices. Examining motivational strategies in this context, therefore, offers insights into both classroom interaction and broader processes of educational change.

Although Dörnyei’s motivational frameworks have shaped much of the existing literature, there is growing recognition of the need to view motivation from complementary theoretical perspectives such as Self-Determination Theory (Deci & Ryan, 2000), sociocultural theory (Lantolf, 2006), and critical pedagogy (Freire, 1970). These perspectives highlight the roles of autonomy, social interaction, and power relations, suggesting that motivational strategies can reinforce or challenge existing educational structures. This study draws on these lenses to analyze Iranian learners’ perceptions, emphasizing the unique value of focusing on upper-intermediate-level EFL students, a population that remains underrepresented in previous motivational research.

Across the last three decades, numerous motivational strategies have been proposed to enhance learner persistence (Dörnyei & Csizér, 1998; Dörnyei, 2001). They range from creating a supportive learning atmosphere to helping students develop positive self-beliefs. Still, the extent to which these strategies function similarly across cultural settings remains an open question. Previous studies (Guilloteaux & Dörnyei, 2008) have stressed that strategy effectiveness is not universal; rather, it is shaped by students’ cultural backgrounds, institutional traditions, and expectations about teacher–student roles.

These contextual issues are particularly relevant in Iran. Educational practices are influenced by long-standing hierarchical structures in which teachers are positioned as both academic and moral authorities (Barjesteh et al., 2025). Collectivist orientations often lead learners to prioritize group harmony over individual autonomy. Research in the Iranian context (e.g., Barjesteh et al., 2025; Isaee & Barjesteh, 2025; Safdari, 2018) consistently shows that learners value teacher-driven strategies, such as maintaining order, offering praise, and providing clear guidance, more than strategies that promote independence. Yet rapid social and educational shifts, including the expansion of private language institutes and increasing exposure to international norms, are gradually transforming learner expectations.

Despite the expanding literature, two main gaps remain. First, most studies focus on general or intermediate learners, whereas upper-intermediate learners (those who are most likely to pursue academic or professional use of English) have received limited attention. Their perspectives are essential for understanding sustained motivation at higher stages of language proficiency. Second, the heavy reliance on Dörnyei’s motivational model has limited dialogue with alternative frameworks such as Self-Determination Theory (Deci & Ryan, 2000), sociocultural views of learning (Lantolf, 2006), and critical pedagogy (Freire, 1970). Considering Iranian learners’ perceptions through these broader lenses enables a more nuanced understanding of how motivational practices reflect cultural values and possibilities for educational change.

Upper-intermediate learners represent an especially meaningful but understudied population, as their motivational patterns tend to reflect long-term investment, evolving learner agency, and a more mature understanding of pedagogical expectations. Their perspectives therefore, offer valuable insight into how motivation operates beyond the introductory stages of language learning. Accordingly, this study explores upper-intermediate Iranian EFL learners’ perceptions of motivational strategies, examining both their perceived importance (priority) and the degree to which teachers employ them (frequency). The study addresses three main questions:

RQ1: Which motivational strategies do upper-intermediate Iranian EFL learners consider most important?

RQ2: Which strategies do they perceive teachers as using most frequently?

RQ3: How closely do these two sets of perceptions align?

By addressing these questions, the study contributes to broader discussions of how motivation is culturally situated and how evolving expectations shape educational change in Iran. More broadly, it offers insights relevant to teacher training, language policy, and the shifting role of learners and teachers within Iranian society.

# **2. Literature Review**

## **2.1 Motivation in Second Language Learning**

Research on second language acquisition has consistently shown that motivation is shaped by a complex interaction of personal, social, and contextual factors. Gardner’s (1985) socio-educational model laid the groundwork by distinguishing between integrative and instrumental orientations, demonstrating how learners’ attitudes toward the target language community can affect success. Building on this foundation, Dörnyei (2001) proposed a more classroom-oriented view and outlined a range of practical motivational strategies that teachers can employ. Earlier empirical work by Dörnyei and Csizér (1998) gave these strategies broader pedagogical visibility and influence.

Despite their importance, critics have argued that traditional motivational theories often conceptualize motivation too narrowly, focusing primarily on psychological traits. Oxford and Shearin (1994) called for a more comprehensive framework that addresses learners’ beliefs and sociocultural influences, while Spolsky (2000) emphasized the need to understand motivation as embedded within wider social and educational systems rather than as a purely cognitive construct. These critiques have opened the door for more contextualized approaches to L2 motivation.

## **2.2 Self-Determination and Sociocultural Perspectives**

Self-Determination Theory (SDT), introduced by Deci and Ryan (2000), brought attention to three fundamental psychological needs: autonomy, competence, and relatedness- that shape intrinsic motivation. Applications of SDT to language learning have shown that environments that support learner choice, confidence, and social connection tend to foster stronger motivation (Kormos et al., 2011). However, these needs are not expressed uniformly across cultures. In more collectivist societies, relatedness and teacher recognition often carry greater weight than autonomy (Hiromori, 2009).

Sociocultural theory offers another lens that foregrounds the social construction of motivation. According to Lantolf (2006), motivation emerges through interaction and participation in culturally meaningful practices rather than from internal traits alone. Ushioda (2011) extended this idea with her “person-in-context” approach, arguing that motivation is dynamic and shaped by learners’ lived experiences and relationships. From this perspective, motivational strategies gain meaning only when understood in relation to the learners’ social environment.

## **2.3 Critical Pedagogy and Social Change**

Freire’s (1970) critical pedagogy positions motivation not simply as a psychological driver but as part of an educational process aimed at empowerment and transformation. Within this framework, teaching strategies influence not only students’ engagement but also their sense of agency and capacity to challenge dominant power structures. In language classrooms, motivational practices such as acknowledging learner voice, encouraging dialogue, and supporting autonomy can therefore contribute to broader social change.

This perspective is especially relevant in Iranian educational settings, where hierarchical teacher–student dynamics and exam-oriented practices continue to dominate (Isaee & Barjesteh, 2025). Strategies such as recognizing effort, validating students’ perspectives, and gradually fostering autonomy can be interpreted not only as helpful teaching techniques but also as steps toward shifting traditional classroom roles and expectations. Such cross-cultural variation reflects broader sociocultural patterns (particularly power distance, conflict-avoidance norms, and collectivist values) that shape how learners interpret teacher authority and the motivational meaning of instructional behaviors.

## **2.4 Motivation in the Iranian Context**

Empirical research in Iran has repeatedly highlighted the central role of teachers in shaping students’ motivation. Safdari (2018) found that both teachers and learners placed strong emphasis on teacher behavior and interpersonal support as key motivational factors. Similarly, Karimi and Hosseinizade (2019) reported that teacher support significantly predicted learner motivation, confirming the cultural importance of teacher authority and emotional climate in Iranian classrooms.

Learners in Iran often place less emphasis on autonomy compared to those in Western contexts, an outcome consistent with Iran’s collectivist cultural environment and exam-driven schooling traditions. At the same time, recent developments such as growing access to private language institutes, greater exposure to international media, and rising aspirations for foreign education have gradually shifted learner expectations. Upper-intermediate learners, in particular, show increasing interest in autonomy and recognition, though these preferences remain intertwined with cultural norms regarding teacher leadership. These developments suggest that although teacher-centered expectations remain deeply rooted, a gradual movement toward shared responsibility, learner agency, and more dialogic forms of participation is beginning to take shape among upper-intermediate learners.

These patterns are strongly reinforced by recent empirical evidence. Isaee and Barjesteh (2025) found that Iranian learners’ engagement was powerfully shaped by teacher enthusiasm, affective support, and emotional clarity, demonstrating that motivational influence continues to operate primarily through relational and teacher-centered pathways. Complementing this, the cross-cultural study by Barjesteh et al. (2025) showed that learners in both Iran and Oman prioritized teacher behavior, classroom climate, and recognition of effort as core motivational drivers, though Iranian learners relied more heavily on teacher authority while Omani learners showed slightly greater preference for autonomy-supportive practices. Together, these studies illustrate that motivational expectations in Iran remain closely connected to cultural norms surrounding respect, hierarchy, and emotional leadership, even as subtle shifts toward autonomy are beginning to emerge.

# **Method**

The methodological design of this study was developed to accurately capture upper-intermediate Iranian EFL learners’ perceptions of motivational strategies within private language institutes. A quantitative approach was selected to allow for systematic comparison between the importance learners assign to various strategies and the extent to which they perceive teachers using them. To ensure the reliability and validity of the findings, the study followed a structured sequence involving participant selection, standardized proficiency screening, questionnaire administration, and statistical analysis. The following subsections describe these components in detail.

## **3.1 Participants**

A total of 210 upper-intermediate EFL learners from six private language institutes in Amol, Mazandaran Province (Iran), were initially recruited for the study. To ensure that participants were at a comparable proficiency level, all learners completed an adapted proficiency test based on the Preliminary English Test (PET) framework. Following standard procedures in applied linguistics research (Hatch & Farhady, 1981), individuals whose scores fell more than one standard deviation above or below the group mean were removed from the sample. Because learners with unusually high or low proficiency may hold motivational perceptions that differ significantly from the majority, this step helped maintain the validity of the findings. After this screening, the final sample consisted of 182 learners.

Among these participants, 100 were male, and 82 were female, with ages ranging from 19 to 28 (M = 24.5). All were native speakers of Persian, and most were university students (n = 131). None had lived in English-speaking countries, though all had completed both public-school English courses and extended training in private institutes from the elementary to advanced levels. This shared linguistic and educational background makes the sample representative of upper-intermediate EFL learners in Iran’s private institute system.

## **3.2 Instrument**

Two instruments were employed. First, an adapted proficiency test based on the Preliminary English Test (PET) framework provided a standardized measure for proficiency screening. Second, a self-report questionnaire adapted from Cheng and Dörnyei (2007) was used to assess perceptions of motivational strategies. The questionnaire comprised two parallel sections with 48 items each: the first measuring the perceived importance of strategies, and the second their observed frequency of teachers’ use. Responses were recorded on six-point Likert scales, ranging from “not important” to “very important” (importance) and from “hardly ever” to “very often” (frequency). Minor wording adjustments were made to several items to improve clarity and ensure contextual appropriateness for Iranian learners, while preserving the original meaning and structure of the instrument.

To facilitate interpretation, the items were grouped into ten multi-item scales (e.g., teacher behavior, group cohesiveness, promoting self-confidence). Cronbach’s alpha coefficients confirmed acceptable reliability across all scales, exceeding the .60 threshold recommended by Pallant (2013). In this study, reliability coefficients for the ten motivational strategy categories ranged from .65 to .83, indicating acceptable to strong internal consistency across the scales.

## **3.3 Procedure**

The study was conducted over four months during the academic year. Data collection unfolded in three main stages:

### ***3.3.1 Stage 1: Proficiency Screening***

At the outset, all 210 volunteers took an adapted proficiency test based on the Preliminary English Test (PET) framework. The purpose was to ensure that participants represented a relatively homogenous group of upper-intermediate EFL learners. Following standard practice in applied linguistics research (Hatch & Farhady, 1981), those whose scores fell more than one standard deviation above or below the mean were excluded. This step was crucial to prevent atypical proficiency levels from skewing the results, since learners with significantly higher or lower English skills might hold perceptions of motivation that differ systematically from the majority. After this process, the working sample was reduced to 182 students.

### ***3.3.2 Stage 2: Questionnaire Administration***

The adapted Cheng and Dörnyei (2007) questionnaire was distributed during regular class hours in the participating language institutes. To ensure clarity, the teacher-researchers provided oral explanations in Persian, including examples of how to complete the Likert scales. This was particularly important because some items contained technical pedagogical terms that could be ambiguous if presented only in English. Students were assured that their responses would remain anonymous and confidential, and participation was entirely voluntary. These measures were intended to reduce social desirability bias and encourage honest responses. Learners typically completed the questionnaire in 25–30 minutes.

### ***3.3.3 Stage 3: Data Coding and Analysis***

Once collected, the questionnaires were reviewed for completeness. Responses were coded numerically, with scales ranging from 1 (“not important”/“hardly ever”) to 6 (“very important”/“very often”). Items were grouped into ten clusters reflecting broader categories of motivational strategies (e.g., appropriate teacher behavior, fostering group cohesion, enhancing learner autonomy). The reliability of each cluster was checked using Cronbach’s alpha, which confirmed that all exceeded the minimum benchmark of 0.60 (Pallant, 2013).

## **3.4 Data Analysis**

Descriptive statistics, including means and standard deviations, were used to summarize learners’ ratings of the importance and frequency of each strategy. The strategies were ranked within each category to identify the highest- and lowest-rated items. To examine the alignment between importance and frequency, the study used standardized z-scores and a Spearman rank-order correlation. This analysis allowed for a non-parametric assessment of the degree to which learners’ motivational priorities were reflected in classroom practices.

## **3.5 Ethical Considerations**

All participants gave informed consent before completing the questionnaire. They were briefed on the purpose of the research and assured that results would be reported in aggregate form only, without identifying individuals or specific institutions. The study adhered to the ethical guidelines of the participating universities and complied with general standards for research involving human subjects.

# **4. Results**

The analysis proceeded in several steps. First, descriptive statistics were used to rank motivational strategies by importance and frequency. Then, a correlation analysis examined alignment between learners’ priorities and their perceptions of teachers’ practices. Additional comparisons were made across demographic subgroups (gender and age) and across institutions, followed by a gap analysis to highlight discrepancies between what students value and what they observe in practice.

## **4.1 Importance of Motivational Strategies**

Table 1 presents the ranking of motivational strategies according to learners’ ratings of importance.

**Table 1.** Ranking of Motivational Strategies by Importance

| Rank | Scale | Mean | Cronbach α |
| --- | --- | --- | --- |
| 1 | Appropriate teacher behavior | 5.66 | .83 |
| 2 | Recognition of learners’ efforts | 5.62 | .78 |
| 3 | Pleasant classroom climate | 5.42 | .81 |
| 4 | Promoting self-confidence | 5.30 | .71 |
| 5 | Promoting group cohesiveness and norms | 4.60 | .79 |
| 6 | Enhancing goal-orientedness | 4.57 | .68 |
| 7 | L2 values (making learners familiar with) | 3.98 | .67 |
| 8 | Stimulating tasks (making them engaging) | 3.95 | .74 |
| 9 | Enhancing autonomy | 3.84 | .72 |
| 10 | Presenting tasks properly | 4.18 | .65 |

The highest-rated strategy was *appropriate teacher behavior* (M=5.66), indicating that learners almost unanimously expect teachers to serve as role models. *Recognition of learners’ efforts* followed closely (M=5.62), showing that acknowledgement is nearly as important as teacher conduct. *Pleasant classroom climate* (M=5.42) also scored highly, while *enhancing autonomy* (M=3.84) and *stimulating tasks* (M=3.95) were rated lowest. The spread between the top-ranked (5.66) and lowest-ranked (3.84) strategies was 1.82 points, highlighting a strong preference for teacher-driven strategies over learner-driven ones.

## **4.2 Frequency of Teachers’ Use of Strategies**

Table 2 ranks strategies based on how frequently learners observed their teachers applying them.

**Table 2.** Ranking of Motivational Strategies by Frequency

| Rank | Scale | Mean | Cronbach α |
| --- | --- | --- | --- |
| 1 | Pleasant classroom climate | 5.15 | .81 |
| 2 | Presenting tasks properly | 5.11 | .78 |
| 3 | Appropriate teacher behavior | 4.98 | .77 |
| 4 | Promoting self-confidence | 4.87 | .68 |
| 5 | Stimulating tasks (making them engaging) | 4.73 | .77 |
| 6 | Promoting group cohesiveness and norms | 4.65 | .76 |
| 7 | Enhancing goal-orientedness | 4.33 | .71 |
| 8 | Recognition of learners’ efforts | 3.88 | .75 |
| 9 | Enhancing autonomy | 3.43 | .80 |
| 10 | L2 values (making learners familiar with) | 3.22 | .67 |

Learners perceived their teachers as most frequently creating a *pleasant classroom climate* (M=5.15) and *presenting tasks properly* (M=5.11). Both scores were above 5, suggesting these practices are consistently observed. In contrast, *making learners familiar with L2 values* (M=3.22) and *enhancing autonomy* (M=3.43) were reported least often, falling nearly two full points lower than the top-ranked practices. This suggests that while teachers focus on fostering a positive environment and delivering lessons effectively, they invest less in cultivating learner independence or cultural awareness of English.

## **4.3 Relationship Between Importance and Frequency**

Table 3 presents the Spearman correlation between importance and frequency rankings.

**Table 3.** Correlation Between Priority and Prevalence of Strategies

| Variables | Spearman’s rho | Sig. (2-tailed) |
| --- | --- | --- |
| Importance vs. Frequency | .39** | .000 |
| Note. p < .01. |  |  |

The correlation coefficient (ρ=.39, p < .01) indicates a statistically significant but modest association between what learners value and what they observe. In practical terms, fewer than 16% of the variations in frequency can be explained by importance (ρ² ≈ .15), showing that teachers’ practices do not consistently align with student expectations. A Spearman rank-order correlation revealed a weak but statistically significant association between the importance and frequency scores. This weak association indicates that teachers’ actual classroom practices only partially reflect the strategies learners consider most important, suggesting limited practical alignment between perceived value and observed implementation.

## **4.4 Top vs. Bottom Strategies**

Table 4 compares the three highest and three lowest strategies across importance and frequency.

**Table 4.** Comparison of Top- and Bottom-Ranked Strategies

| Ranking | Importance (Mean) | Frequency (Mean) |
| --- | --- | --- |
| Top 1 | Teacher behavior (5.66) | Pleasant climate (5.15) |
| Top 2 | Recognition of effort (5.62) | Presenting tasks properly (5.11) |
| Top 3 | Pleasant climate (5.42) | Teacher behavior (4.98) |
| Bottom 3 | Task presentation (4.18) | Recognition of effort (3.88) |
| Bottom 2 | Autonomy (3.84) | Autonomy (3.43) |
| Bottom 1 | L2 values (3.98) | L2 values (3.22) |

The contrast is striking: while *recognition of effort* is the second most valued strategy (M=5.62), it ranks among the least frequently observed (M=3.88). This discrepancy of 1.74 points highlights a major gap between learners’ expectations and classroom realities. Similarly, *L2 values* were rated relatively low in importance (M=3.98) and even lower in frequency (M=3.22), showing consistent neglect.

## **4.5 Gap Analysis**

Table 5 quantifies mismatches between importance and frequency.

**Table 5.** Gap Analysis Between Importance and Frequency

| Strategy | Importance (Mean) | Frequency (Mean) | Gap |
| --- | --- | --- | --- |
| Recognition of effort | 5.62 | 3.88 | +1.74 |
| Teacher behavior | 5.66 | 4.98 | +0.68 |
| Pleasant climate | 5.42 | 5.15 | +0.27 |
| Self-confidence | 5.30 | 4.87 | +0.43 |
| Group cohesiveness | 4.60 | 4.65 | –0.05 |
| Autonomy | 3.84 | 3.43 | +0.41 |
| L2 values | 3.98 | 3.22 | +0.76 |

The largest gap was in *recognition of effort* (+1.74), confirming it as the most underutilized strategy relative to its importance. Moderate gaps were also found in *L2 values* (+0.76) and *teacher behavior* (+0.68). Only *group cohesiveness* showed near-perfect alignment (–0.05), indicating teachers apply this strategy almost exactly in line with learners’ expectations.

## **4.6 Exploratory Group Comparisons**

Descriptive breakdowns by gender and age are presented in Table 6.

**Table 6.** Illustrative Trends by Gender and Age

| Strategy | Female Mean | Male Mean | Younger (18–22) | Older (23–29) |
| --- | --- | --- | --- | --- |
| Recognition of effort | 5.75 | 5.50 | 5.60 | 5.55 |
| Pleasant classroom climate | 5.50 | 5.35 | 5.40 | 5.45 |
| Promoting self-confidence | 5.35 | 5.25 | 5.45 | 5.20 |
| Enhancing autonomy | 3.80 | 3.90 | 3.70 | 4.00 |

Female students placed slightly greater emphasis on *recognition of effort* (M=5.75 vs. 5.50 for males) and *pleasant climate* (M=5.50 vs. 5.35). Younger learners prioritized *self-confidence* (M = 5.45 vs. 5.20 for older learners), while older learners emphasized *autonomy* (M=4.00 vs. 3.70). These subgroup contrasts, though small, suggest that motivational preferences evolve with gendered expectations and learner maturity.

## **4.7 Institutional Variations**

Table 7 compares illustrative patterns across the six participating institutes.

**Table 7.** Illustrative Institutional Trends

| Institute | Top Strategy (Importance) | Lowest Strategy (Frequency) | Notable Pattern |
| --- | --- | --- | --- |
| A | Teacher behavior (5.70) | Autonomy (3.40) | Strong teacher authority focus |
| B | Pleasant climate (5.50) | L2 values (3.30) | Warm atmosphere, less cultural emphasis |
| C | Recognition of effort (5.65) | Recognition of effort (3.85) | Large importance–use gap |
| D | Self-confidence (5.40) | L2 values (3.20) | Emphasis on affective support |
| E | Group cohesiveness (4.75) | Autonomy (3.50) | Collectivist orientation |
| F | Teacher behavior (5.60) | Recognition of effort (3.90) | Similar to Institute C |

Across institutes, *teacher behavior* and *pleasant climate* consistently topped importance rankings (scores above 5.50). However, wide institutional variation was visible in the frequency of *recognition of effort*, ranging from 3.85 (Institute C) to 3.90 (Institute F), despite high importance ratings (5.60+). This suggests institutional cultures shape how consistently teachers implement motivational practices.

## **4.8 Visualizations**

Two visualizations were prepared to complement the tabular findings and provide a clearer overview of the relationship between importance and frequency of motivational strategies.

Figure 1 presents a bar chart comparing the mean scores for importance and frequency across all ten strategies. The chart makes visible the general trend that strategies considered most important by learners, such as teacher behavior and recognition of effort, are not always the most frequently observed in practice. In particular, recognition of effort stands out with one of the largest gaps, showing high importance but low frequency. This visualization allows for a quick comparison of strategies side by side, highlighting where the most striking mismatches occur.


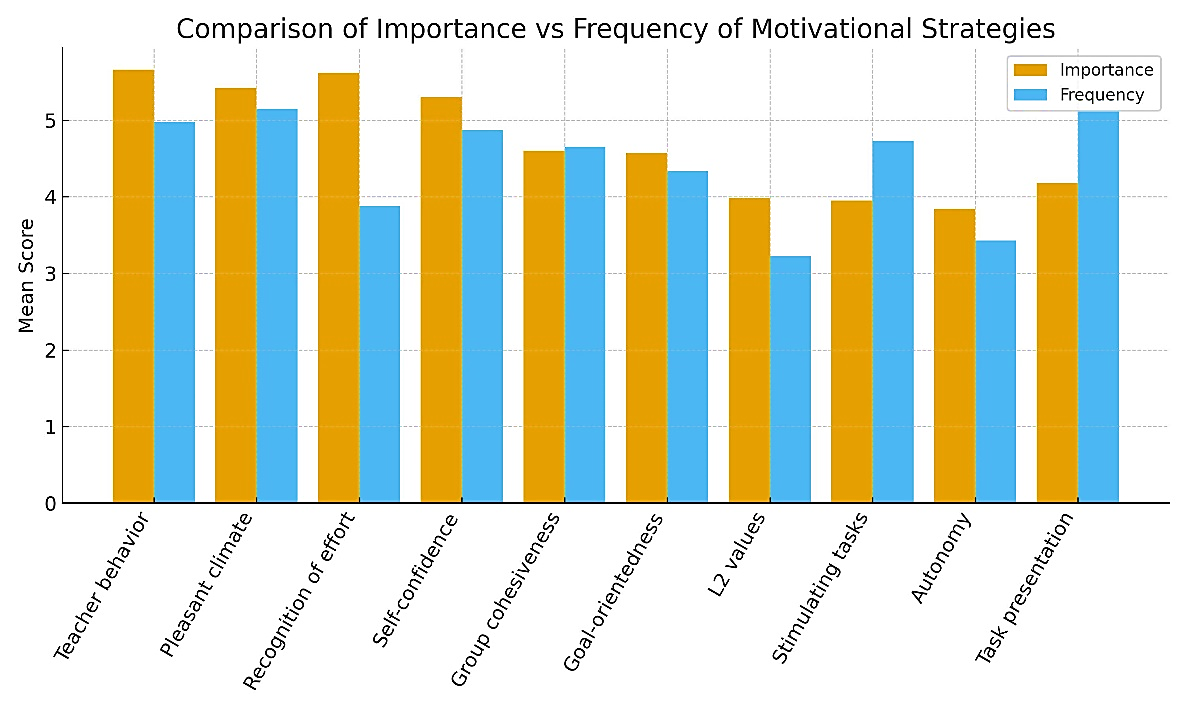


**Figure 1.** Comparison of Importance vs Frequency of Motivational Strategies

Figure 2 displays a scatterplot of importance against frequency for each strategy, with a regression line illustrating the overall trend. The modest positive correlation (ρ=.39) is visually apparent: strategies that learners value highly tend to be somewhat more frequently observed, yet the relationship is far from perfect. Outliers such as recognition of effort appear in the upper-left quadrant, where importance is high but frequency is low, illustrating clear inconsistencies between learner expectations and teacher practices. By contrast, strategies like group cohesiveness cluster near the regression line, showing closer alignment between value and practice.


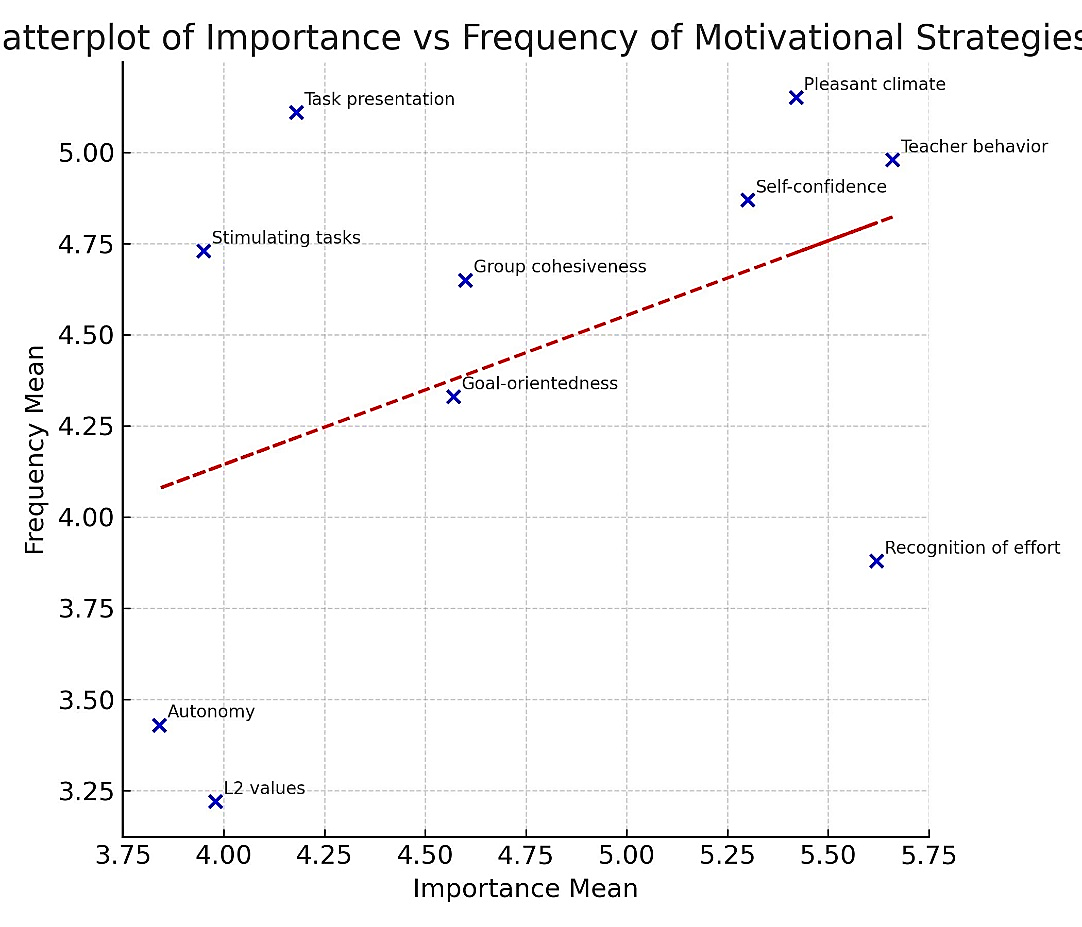


**Figure 2.** Scatterplot of Importance vs Frequency of Motivational Strategies

# **5. Discussion**

The findings of this investigation reveal a motivational landscape that is deeply shaped by cultural expectations, interpersonal dynamics, and evolving educational practices in Iran. Learners placed the greatest importance on appropriate teacher behavior, recognition of effort, and the creation of a positive classroom climate. These results resonate strongly with longstanding motivational theories that position the teacher as the central architect of the classroom motivational environment (Dörnyei & Csizér, 1998; Dörnyei, 2001; Gardner, 1985). Decades of research have emphasized that learners’ motivation is reinforced through teacher credibility, fairness, enthusiasm, and emotional warmth, and the present findings reaffirm the enduring influence of these factors in the Iranian EFL context.

The high value placed on teacher behavior and classroom atmosphere reflects cultural patterns documented across Iranian studies, where the teacher is regarded not only as an instructional expert but as an emotional resource and a moral guide (Karimi & Hosseini Zade, 2019; Safdari, 2018). These expectations align with principles proposed in sociocultural theory (Lantolf, 2006), which asserts that motivation emerges from social interaction and cultural norms. In settings where hierarchical relationships and teacher leadership are deeply ingrained, motivational engagement tends to be relationally organized around the teacher’s actions. This helps explain why learners perceived teacher behavior as the strongest contributor to their motivation, a pattern also reported in the more recent Iran-based study on teacher enthusiasm and engagement (Isaee & Barjesteh, 2025), where enthusiastic teaching significantly predicted learner participation and emotional involvement. These patterns align with broader engagement research showing that student participation is strongly shaped by the emotional tone of instruction, the relational quality of teacher–student interactions, and the extent to which classrooms support sustained cognitive and affective involvement (Frenzel et al., 2018; Hiver et al., 2021; Mercer & Dörnyei, 2020).

A particularly noteworthy finding is the gap between the high value placed on recognizing effort and the relatively lower frequency with which learners reported encountering this strategy. A similar mismatch was found in Taiwan (Cheng & Dörnyei, 2007) and in earlier Iranian work, suggesting that recognition is both culturally meaningful and pedagogically underutilized. Within Self-Determination Theory (Deci & Ryan, 2000), recognition fulfills the need for competence affirmation; therefore, infrequent use of praise may inadvertently weaken learners’ sense of progress, especially in a system heavily oriented toward assessment and error detection. This gap indicates an actionable area where teachers could better align their practice with learners’ motivational expectations.

The patterns observed here align closely with the Iran–Oman comparative study conducted by Barjesteh et al. (2025), which found that learners in both countries prioritized teacher behavior, classroom climate, and recognition as the strongest motivational drivers. Interestingly, while regional similarities were considerable, subtle differences emerged: Omani learners placed slightly stronger emphasis on autonomy and metacognitive regulation, whereas Iranian learners leaned more toward teacher-directed strategies. These cross-country contrasts likely reflect broader policy trajectories, as Oman has implemented sustained educational reforms promoting learner agency and communicative pedagogy, whereas Iranian classrooms continue to be shaped more strongly by centralized curricula, exam-driven routines, and traditional hierarchies of teacher authority. Despite these differences, both contexts demonstrated only weak correlations between the perceived importance and frequency of motivational strategies, suggesting partial alignment but persistent gaps between what learners value and what they observe in practice.

Emerging trends also point to increasing appreciation for autonomy-supportive strategies among more mature learners. While autonomy did not rank among the top strategies overall, older learners assigned it greater importance than younger peers, echoing findings from vision-based and autonomy-focused interventions (Safdari, 2021) and engagement literature emphasizing learner agency (Oga-Baldwin, 2019; Mercer & Dörnyei, 2020). This gradual shift may reflect broader social changes, including exposure to international media, increased prevalence of private language institutes, and aspirations for overseas academic mobility. These factors collectively introduce learners to alternative models of interaction where autonomy and collaboration are more heavily emphasized.

Recent international research further reinforces the interpretation that teacher behavior and emotional climate continue to be powerful motivational forces. Studies such as Frenzel et al. (2018) and Lazarides et al. (2019) demonstrate reciprocal emotional influence between teachers and students, while Hiver et al. (2021) describe engagement as an affective, cognitive, and behavioral process co-constructed within supportive learning environments. Insights from classroom management and instructional quality research (Larson et al., 2021; Baier et al., 2019) similarly show that clear expectations, structured routines, and teacher warmth create psychological safety, enabling students to engage more deeply and persistently. These frameworks align with the motivational preferences observed in the present study and help explain why teacher-led strategies retain such a strong appeal in Iranian classrooms. Conceptually, these findings highlight that motivational strategies operate not merely as instructional techniques but as culturally mediated relational practices, shaped by learners’ expectations about authority, emotional support, and the sociocultural norms that structure classroom life.

Taken together, the findings depict a motivational ecology that blends long-standing cultural expectations with emerging desires for autonomy and participatory learning. Robust teacher leadership, emotional support, and recognition remain central pillars of motivation, yet subtle shifts toward autonomy suggest that learners are gradually adapting to more learner-centered global pedagogical trends. This duality reflects a system in transition, where traditional hierarchies continue to guide classroom relationships but coexist increasingly with aspirations for self-direction, engagement, and collaborative learning.

# **6. Conclusion**

The findings of this study highlight the central role of teacher behavior, recognition of effort, and classroom climate in shaping advanced Iranian EFL learners’ motivation. These preferences reflect long-standing cultural expectations surrounding teacher authority and interpersonal warmth, yet they also suggest the beginnings of a shift toward more autonomy-supportive practices. Although learners continue to value teacher-led motivational strategies, subtle generational differences point to evolving attitudes influenced by broader educational and social changes. The results correspond closely with earlier research conducted in Iran and with comparative work involving Iran and Oman, indicating that the motivational significance of teacher behavior and emotional support remains robust across similar regional contexts.

Despite these valuable insights, several limitations should be acknowledged. First, the study relied on self-report questionnaires, which, while efficient, may be affected by social desirability or individual interpretation of items. Observational or mixed-method approaches could provide a richer understanding of how motivational strategies are enacted in real classroom settings. Second, the study focused on advanced learners within private language institutes; learners at lower proficiency levels or in public schools may hold different motivational expectations. Third, the cross-sectional design captures perceptions at a single point in time and cannot account for how motivation evolves as learners gain experience or encounter different instructional styles.

Future research would benefit from examining motivational strategy use through classroom observations, teacher–student interviews, or longitudinal designs that track motivational development over time. Comparative studies involving additional cultural or institutional contexts could further clarify which motivational preferences are culturally specific and which are more universal. Investigating teachers’ own beliefs and constraints could also illuminate why certain strategies (such as recognition of effort) are valued by learners yet inconsistently implemented in practice. As autonomy gradually gains relevance among older learners, future studies may also explore how digital tools, blended learning, and learner-designed tasks contribute to a more participatory motivational climate. Future research would also benefit from examining how motivational practices evolve across proficiency levels and instructional contexts, and from integrating classroom observations or teacher interviews to triangulate learners’ perceptions with actual pedagogical behavior.

The findings carry practical implications for language teaching in Iran and similar contexts. Teacher training programs should emphasize the interpersonal dimensions of teaching (fairness, enthusiasm, emotional support, and timely recognition), as these remain the strongest levers for enhancing motivation. At the same time, teachers may consider gradually integrating autonomy-supportive techniques, such as offering meaningful choices, involving learners in goal setting, and encouraging reflective learning habits (Isaee & Barjesteh, 2023). Institutional leaders can foster environments that balance structure with opportunities for learner agency, supporting a smooth transition toward more interactive and learner-centered pedagogies. For practitioners, the findings underscore the value of adopting a more intentional and responsive motivational repertoire, one that integrates culturally grounded relational support with expanding opportunities for autonomy, strategic reflection, and shared classroom responsibility.

In summary, the study underscores that effective motivational practice requires both cultural attunement and pedagogical adaptability. By understanding learners’ expectations and aligning instruction with their motivational needs, teachers can create learning environments that not only sustain engagement but also respond to the evolving educational aspirations of contemporary EFL learners. Taken together, the findings reaffirm that effective motivational practice in Iranian EFL settings depends on a nuanced balance between culturally grounded teacher leadership and learners’ evolving expectations for autonomy, recognition, and active participation.

# **Declarations**

## **Competing Interests**

The authors declare no conflict of interest.

## **Funding**

This work received no funding.

## **Clinical Trial Number**

## Clinical trial number: not applicable.

## **Consent to Publish**

The authors affirm that all individual participants provided informed consent for publication of this paper.

## **Consent to Participate**

The authors affirm that informed consent to participate in the study was obtained from all the individual participants.

## **Ethics statement**

This study was reviewed and approved by the Ethics Committee of Islamic Azad University, Ayatollah Amoli Branch (Approval No. 2025-079 Date: 2025, Feb.03). All participants provided written informed consent before taking part in the research. This study was conducted in accordance with the ethical standards of the institutional research committee and with the 1964 Helsinki Declaration and its later amendments. The Ethics Committee of IAU waived the requirement for formal ethics approval as the study involved an anonymous survey with no identifiable personal data.

## **Author Contribution**

All authors contributed equally. Conceptualization, H.I.; methodology, H.B.; software, H.B.; validation, H.B.; formal analysis, H.I.; investigation, H.I.; resources, H.I.; data curation, H.I.; writing—original draft preparation, H.I.; writing—review and editing, H.B.; visualization, H.B.; supervision, H.B.; project administration, H.I. All authors have read and agreed to the published version of the manuscript.

## **Acknowledgement**

We sincerely thank all the editors, managers, and reviewers of *Human Arenas* for their insightful comments and guidance. Additionally, we would like to thank the participants for their contributions to this study.

## **Data Availability**

The data are available upon request from the corresponding author.

# **References**

Abdal, R., Sahril, & Fitriyani. (2025). Teachers’ Motivational Strategies in Fostering Students’ Motivation in English Learning. *International Journal of Language, Education, and Literature*, *2*(4), 597–601. Retrieved from <http://journal.unm.ac.id/index.php/IJLEL/article/view/8854>

Ary, D., Jacobs, L. C., Irvine, C. K. S., & Walker, D. A. (2019). *Introduction to research in education*(10th ed.). Cengage Learning.

Baier, F., Decker, A. T., Voss, T., Kleickmann, T., Klusmann, U., & Kunter, M. (2019). What makes a good teacher? The relative importance of mathematics teachers’ cognitive ability, personality, knowledge, beliefs, and motivation for instructional quality. *British Journal of Educational Psychology, 89*(4), 767-786. <https://doi.org/10.1111/bjep.12256>

Author Vijayaratnam, P., Author, H., Gholipour, H., & Shirzad, S. (2025). A Cross-Cultural Examination of EFL Learners’ Perceptions of Teachers’ Motivational Strategies: Evidence from Iran and Oman. *Forum for Linguistic Studies 7*(12): 1106–1116. DOI: <https://doi.org/10.30564/fls.v7i12.10264>

Cheng, H., & Dörnyei, Z. (2007). The use of motivational strategies in language instruction: The case of EFL teaching in Taiwan. *Innovation in Language Learning and Teaching, 1*(1), 153–174. <https://doi.org/10.2167/illt048.0>

Deci, E. L., & Ryan, R. M. (2000). The “what” and “why” of goal pursuits: Human needs and the self-determination of behavior. *Psychological Inquiry, 11*(4), 227–268. <https://doi.org/10.1207/S15327965PLI1104_01>

Dörnyei, Z. (2001). *Motivational strategies in the language classroom*. Cambridge University Press.

Dörnyei, Z., & Csizér, K. (1998). Ten commandments for motivating language learners: Results of an empirical study. *Language Teaching Research, 2*(3), 203–229. <https://doi.org/10.1177/136216889800200303>

Ferrer, J., Ringer, A., Saville, K., Parris, M. A., & Kashi, K. (2020). Students’ motivation and engagement in higher education: The importance of attitude to online learning. *Higher Education, 83*, 317-338. <https://doi.org/10.1007/sl073402000657-5>

Freire, P. (1970). *Pedagogy of the Oppressed*. Continuum.

Frenzel, A. C., Becker-Kurz, B., Pekrun, R., Goetz, T., & Lüdtke, O. (2018). Emotion transmission in the classroom revisited: A reciprocal effects model of teacher and student enjoyment. *Journal of Educational Psychology*, *110*(5), 628-639. <https://doi.org/10.1037/edu0000228>

Gafarova , S. . (2025). The role of motivation in second language acquisition (SLA) for EFL learners. *International Journal of Artificial Intelligence*, *1*(3), 854–857. Retrieved from <https://inlibrary.uz/index.php/ijai/article/view/81101>

Gardner, R. C. (1985). *Social psychology and second language learning: The role of attitudes and motivation*. Edward Arnold.

Goe, L., Bell, C., & Little, O. (2008). *Approaches to evaluating teacher effectiveness: A research synthesis*. National Comprehensive Center for Teacher Quality. <http://files.eric.ed.gov/fulltext/ED521228.pdf>

Guilloteaux, M. J., & Dörnyei, Z. (2008). Motivating language learners: A classroom-oriented investigation of the effects of motivational strategies on student motivation. *TESOL Quarterly, 42*(1), 55–77. <https://doi.org/10.1002/j.1545-7249.2008.tb00207.x>

Hiromori, T. (2009). A process model of L2 learners’ motivation: From the perspectives of general tendency and individual differences. *System, 37*(2), 313–321. <https://doi.org/10.1016/j.system.2008.11.009>

Hiver, p., Al-Hoorie, A. H., Vitta, J. P., & Wu, J. (2021). Engagement in language learning: A systematic review of 20 years of research methods and definitions. *Language Teaching Research, 28*(1), 201-230. <https://doi.org/10.1177/13621688211001289>

Author & Author (2023). EFL teachers’ professional development needs: A comparative phenomenological analysis for face-to-face and online instruction. *Journal of Studies in Learning and Teaching English*, *12*(2), 45-56. <https://journals.iau.ir/article_705784_5628e1dd65c8fc95c5522f9059873041.pdf>

Author & Author (2025). The relation between Iranian EFL learners' perception of teacher enthusiasm and their engagement in the context of second-language classrooms. *Applications of Language Studies*, *3*(1), 74-102. <https://jals.hmu.ac.ir/article_713674.html>

Karimi, M. N., & Hosseini Zade, M. (2019). The motivational impact of teacher support on Iranian EFL learners. *Asian EFL Journal, 21*(2), 140–162.

Kormos, J., Kiddle, T., & Csizér, K. (2011). Systems of goals, attitudes, and self-related beliefs in second-language-learning motivation. *Applied Linguistics, 32*(5), 495–516. https://doi.org/10.1093/applin/amr019

Kuhn, C., Hagenauer, G., Gröschner, A., & Bach, A. (2024). Mentor teachers’ motivations and implications for mentoring style and enthusiasm. *Teaching and Teacher Education, 139*, 104441. <https://doi.org/10.1016/j.tate.2023.104441>

Lantolf, J. P. (2006). Sociocultural theory and L2: State of the art. *Studies in Second Language Acquisition, 28*(1), 67–109. <https://doi.org/10.1017/S0272263106060037>

Larson, K. E., Pas, E. T., Bottiani, J. H., Kush, J. M., & Bradshaw, C. P. (2021). A multidimensional and multilevel examination of student engagement and secondary school teachers’ use of classroom management practices. *Journal of Positive Behavior Interventions, 23*(3), 149-162. <https://doi.org/10.1177/1098300720929352>

Lazarides, R., Gaspard, H., & Dicke, A. L. (2019). Dynamics of classroom motivation: Teacher enthusiasm and the development of math interest and teacher support. *Learning and Instruction*, *60*, 126-137. <https://doi.org/10.1016/j.learninstruc.2018.01.012>

Mercer, S., & Dörnyei, Z. (2020). *Engaging students in contemporary classrooms*. Cambridge University Press.

Nazarova, N. ., & Pulatova , M. (2025). THE ROLE OF MOTIVATION IN LANGUAGE LEARNING. *Развитие и инновации в науке*, *4*(3), 17–20. извлечено от <https://inlibrary.uz/index.php/dis/article/view/72740>

Oga-Baldwin, Q. (2019). Acting, thinking, feeling, making, collaborating: The engagement process in foreign language learning. *System*, *86*, 102-128. <https://doi.org/10.1016/j.system.2019.102128>

Oxford, R. L., & Shearin, J. (1994). Language learning motivation: Expanding the theoretical framework. *The Modern Language Journal, 78*(1), 12–28. <https://doi.org/10.1111/j.1540-4781.1994.tb02011.x>

Pallant, J. (2013). *SPSS survival manual* (5th ed.). McGraw-Hill Education.

Praetorius, A. K., Klieme, E., Herbert, B., & Pinger, P. (2018). Generic dimensions of teaching quality: The German framework of three basic dimensions. *ZDM: The International Journal on Mathematics Education*, *50*(3), 407–426. <https://doi.org/10.1007/s11858-018-0918-4>

Rasli, A., Tee, M., Lai, Y. L., Tiu, Z. C., & Soon, E. H. (2022). Post-COVID-19 strategies for higher education institutions in dealing with the unknown and uncertainties. *Frontiers in Education, 7*. <https://doi.org/10.3389/feduc.2022.992063>

Safdari, M. (2018). Iranian EFL teachers’ and learners’ perceptions of motivational strategies. *Journal of Language and Linguistic Studies, 14*(2), 169–183.

Safdari, S. (2021). Operationalizing L2 motivational self-system: Improving EFL learners’ motivation through a vision enhancement program. *Language Teaching Research, 25*(2), 282-305. <https://doi.org/10.1177/1362168819846597>

Spolsky, B. (2000). Language motivation revisited. *Applied Linguistics, 21*(2), 157–169. <https://doi.org/10.1093/applin/21.2.157>

Svalberg, A. M. L. (2017). Researching language engagement: current trends and future directions. *Language Awareness*, *27*(1-2), 21-39. <http://doi.org/10.1080/09658416.2017.1406490>

Ushioda, E. (2011). Motivating learners to speak as themselves. In G. Murray, X. Gao, & T. Lamb (Eds.), *Identity, motivation and autonomy in language learning* (pp. 11–24). Multilingual Matters.
